# Supplementary material
Source: HighWire-hosted journal article supplement (https://rapm.bmj.com/highwire/filestream/21713/field_highwire_adjunct_files/1/rapm-2022-104236supp002_data_supplement.pdf)
Supplement: rapm-2022-104236supp002_data_supplement.pdf [file rapm-2022-104236supp002_data_supplement.pdf]

Supplemental Table 2. Incidence Rates of Safety Outcomes per 10,000 Person-Years

|                                                                                 | <b>ISD</b>                         | <b>MILD</b>                        | <b>Log-rank test</b> |
|---------------------------------------------------------------------------------|------------------------------------|------------------------------------|----------------------|
|                                                                                 | Incidence Rate per 10,000 (95% CI) | Incidence Rate per 10,000 (95% CI) | p-value              |
| <b>Long-term (entire follow-up) complications</b>                               | 264 (225, 309)                     | 253 (215, 297)                     | 0.711                |
| Mechanical complications due to displacement of device                          | N/A <sup>a</sup>                   | N/A <sup>a</sup>                   | N/A                  |
| Mechanical complications due to breakdown or unspecified complication of device | N/A <sup>a</sup>                   | N/A <sup>a</sup>                   | N/A                  |
| Spinous process fracture                                                        | 88 (68, 116)                       | 115 (91, 146)                      | 0.150                |
| Allergic reaction to device implant                                             | 75 (56, 100)                       | 53 (37, 75)                        | 0.136                |
| Infection/inflammation to device implant                                        | N/A <sup>a</sup>                   | N/A <sup>a</sup>                   | N/A                  |
| Lumbosacral spine injury                                                        | N/A <sup>a</sup>                   | N/A <sup>a</sup>                   | N/A                  |
| Nerve root injury                                                               | N/A <sup>a</sup>                   | N/A <sup>a</sup>                   | N/A                  |
| Cerebrospinal fluid leaks                                                       | N/A <sup>a</sup>                   | N/A <sup>a</sup>                   | N/A                  |
| Wound infections                                                                | N/A <sup>a</sup>                   | N/A <sup>a</sup>                   | N/A                  |
| Wound dehiscence                                                                | N/A <sup>a</sup>                   | N/A <sup>a</sup>                   | N/A                  |
| Hematomas                                                                       | 31 (20, 49)                        | 23 (14, 35)                        | 0.386                |
| Thrombophlebitis                                                                | 20 (11, 25)                        | 25 (15, 41)                        | 0.582                |

CI, confidence interval; ISD, interspinous spacer; MILD, minimally invasive lumbar decompression

a: reflects cell counts fewer than 11 individuals which cannot be displayed per the data use agreement with the Centers for Medicare and Medicaid Services
